# Supplementary material for: The Swedish cause of death register
Source: Springer Nature journal article supplement (doi:10.1007/s10654-017-0316-1), 2017-09-01
Supplement: MOESM1 [file 15111440]

## Online resource 1

### ICD codes used to categorise causes of death

| Cause of death category | ICD-10 codes (1997 onwards)                                                                                        | ICD-9 codes (1987 to 1996)                                                                                                       | ICD-8 codes (1969 to 1986)                                                                                                       |
|-------------------------|--------------------------------------------------------------------------------------------------------------------|----------------------------------------------------------------------------------------------------------------------------------|----------------------------------------------------------------------------------------------------------------------------------|
| Alcohol                 | F10 as underlying cause of death or X45 or Y15 as underlying cause of death in combination with T51 as main injury | 305, 291 or 303 as underlying cause of death or E860 or E980 as underlying cause of death in combination with 980 as main injury | 305, 291 or 303 as underlying cause of death or E860 or E980 as underlying cause of death in combination with 980 as main injury |
| Suicide                 | X60-X84                                                                                                            | E950-E959                                                                                                                        | E950-E959                                                                                                                        |
| Vehicle accidents       | V01-V99                                                                                                            | E800-E849                                                                                                                        | E800-E849                                                                                                                        |
| Other accidents         | W00-X59                                                                                                            | E850-E869, E880-E929                                                                                                             | E850-E869, E880-E929                                                                                                             |
| Cardiovascular disease  | I00-I59, I70-I99                                                                                                   | 390-429, 440-459                                                                                                                 | 390-429, 440-459                                                                                                                 |
| Stroke                  | I60-I69                                                                                                            | 430-438                                                                                                                          | 430-438                                                                                                                          |
| Breast/prostate cancer  | C50 (breast), C61(prostate)                                                                                        | 174-175 (breast), 185 (prostate)                                                                                                 | 174 (breast), 185 (prostate)                                                                                                     |
| Lung cancer             | C34                                                                                                                | 162.2-162.9                                                                                                                      | 162.1                                                                                                                            |
| Other cancer            | C00-C33, C35-C49, C51-C60, C62-C97                                                                                 | 140-162.1, 163-173, 176-184, 186-239                                                                                             | 140-161, 163-173, 176-184, 186-239                                                                                               |
| Other                   | All other codes                                                                                                    | All other codes                                                                                                                  | All other codes                                                                                                                  |
